# Supplementary material for: Meteorological Data‐Based Optimal Control Strategy for Microalgae Cultivation in Open Pond Systems
Source: Hindawi journal article supplement (doi:10.1155/2019/4363895), 2019-01-01
Supplement: f1 [file 4363895.f1.pdf]

# Meteorological data-based optimal control strategy for microalgae cultivation in open pond systems

*Supplementary material*

Riccardo De Luca<sup>1</sup>, Fabrizio Bezzo<sup>1</sup>, Quentin Béchet<sup>2</sup>, Olivier Bernard<sup>2</sup>

*Hindawi, Complexity, Article ID 4363895*

<sup>1</sup>CAPE-Lab Computer-Aided Process Engineering Laboratory, Department of Industrial Engineering, Università di Padova, via Marzolo 9, I-35131, Padova, Italy

<sup>2</sup>BIOCORE, INRIA, Université Côte d'Azur, BP93, 06902 Sophia-Antipolis Cedex, France

---

## S1 Model presentation

### S1.1 Temperature model

The formal expression of each heat flow in Equation 8 was extracted from [1]. Assuming the water surface to be gray-diffuse, the radiation  $Q_{ra,p}$  from the pond surface to the atmosphere was given by Stefan-Boltzmann's fourth power law:

$$Q_{ra,p} = -\varepsilon_w \sigma_{SB} T_p^4 S, \quad (S1-1)$$

where  $\varepsilon_w$  is the emissivity of water and  $\sigma_{SB}$  is the Stefan-Boltzmann constant ( $\text{W m}^{-2} \text{K}^{-4}$ ). The heat flow associated with solar irradiance  $Q_{ra,s}$  was expressed as follows:

$$Q_{ra,s} = (1 - f_a) H_s S, \quad (S1-2)$$

where  $f_a$  is the theoretical photosynthetic efficiency (the fraction of PAR that is effectively used during the photosynthetic process). The heat flow generated by air radiation was described as:

$$Q_{ra,a} = \varepsilon_a \varepsilon_w \sigma_{SB} T_a^4 S, \quad (S1-3)$$

where  $\varepsilon_a$  is the emissivity of the air and  $T_a$  is the air temperature (K). The evaporation heat flow  $Q_{ev}$  was given by the equation:

$$Q_{ev} = -m_e L_w S, \quad (S1-4)$$

where  $L_w$  is the water latent heat ( $\text{J kg}^{-1}$ ), whereas  $m_e$  is the evaporation rate ( $\text{kg m}^{-2} \text{s}^{-1}$ ). The following expression was used to calculate  $m_e$ :

$$m_e = K \left( \frac{P_w}{T_p} - \frac{RH \cdot P_a}{T_a} \right) \frac{M_w}{R}, \quad (S1-5)$$

where  $K$  is the mass transfer coefficient ( $\text{m s}^{-1}$ ),  $P_w$  and  $P_a$  are, respectively, the saturated vapor pressure (Pa) at  $T_p$  and  $T_a$ , evaluated through the following empirical correlation:

$$P_i = 3385.5 \cdot e^{(-8.0929 + 0.97608(T_i + 42.607 - 273.15)^{0.5})}, \quad (S1-6)$$

where the  $i$  index represents air or water,  $RH$  is the relative air humidity above the pond surface,  $M_w$  is the molecular weight of water ( $\text{kg mol}^{-1}$ ) and  $R$  is the universal ideal gas constant ( $\text{Pa m}^3 \text{mol}^{-1} \text{K}^{-1}$ ). The mass transfer coefficient  $K$  in (S1-5) was calculated through the following two correlations:

$$Sh = 0.035 Re^{0.8} Sc^{1/3} \quad \text{for turbulent flows,} \quad (S1-7a)$$

$$Sh = 0.628 Re^{0.5} Sc^{1/3} \quad \text{for laminar flows,} \quad (S1-7b)$$

where  $Sh = KL/D_{w,a}$ ,  $Re = Lv_w/\nu_a$  and  $Sc = \nu_a/D_{w,a}$ . The dimensionless variables  $Sh$ ,  $Re$  and  $Sc$  are, respectively, the Sherwood, Reynolds and Schmidt

---

numbers,  $L$  is the characteristic pond length (m),  $D_{w,a}$  is the mass diffusion coefficient of water vapor in air ( $\text{m}^2 \text{s}^{-1}$ ),  $v_w$  is the wind velocity ( $\text{m s}^{-1}$ ) and  $\nu_a$  is the air kinematic viscosity ( $\text{m}^2 \text{s}^{-1}$ ). The convective flow  $Q_{conv}$ , defined as:

$$Q_{conv} = h_{conv}(T_a - T_p)S \quad (\text{S1-8})$$

was calculated by evaluating the heat transfer coefficient  $h_{conv}$  ( $\text{W m}^{-2} \text{K}^{-1}$ ) value through the following set of correlations:

$$Nu = 0.035Re^{0.8}Pr^{1/3} \quad \text{for turbulent flows,} \quad (\text{S1-9a})$$

$$Nu = 0.628Re^{0.5}Pr^{1/3} \quad \text{for laminar flows,} \quad (\text{S1-9b})$$

where  $Nu = h_{conv}L/\lambda_a$  and  $Pr = \nu_a/\alpha_a$ ,  $\lambda_a$  is the air thermal conductivity ( $\text{W m}^{-1} \text{K}^{-1}$ ) and  $\alpha_a$  the air thermal diffusivity ( $\text{m}^2 \text{s}^{-1}$ ). Meteorological stations measure the wind velocity at a certain height  $z_0$  (m), which usually differs from the height at which  $v_w$  is needed in the previous correlations (0.5 m). The conversion of the wind velocity from the height  $z_0$  to 0.5 m was performed by using the following expression:

$$v_w = v_0 \left( \frac{z}{z_0} \right)^\alpha, \quad (\text{S1-10})$$

where  $v_0$  is the wind velocity ( $\text{m s}^{-1}$ ) measured at height  $z_0$  and  $\alpha$  is a power law exponent. The equation that describes the conductive heat flow between the pond and the soil was based on Fourier's law:

$$Q_{cond} = k_s S \frac{dT_s}{dz}(z = 0), \quad (\text{S1-11})$$

where  $k_s$  is the soil conductivity ( $\text{W m}^{-1} \text{K}^{-1}$ ) and  $T_s$  the soil temperature (K). The value of  $T_s$  was obtained from the following equation and initial/boundary conditions:

$$c_{p_s} \rho_s \frac{dT_s}{dt}(z, t) = k_s \frac{d^2 T_s}{dz^2}(z, t) \quad (\text{S1-12})$$

$$\begin{cases} T_s(t, z = 0) = T_p(t) & \text{b.c.(1)} \\ T_s(t, z = l_{s_{ref}}) = T_{s_{ref}} & \text{b.c.(2)} \\ \frac{d^2 T_s}{dz^2}(t = 0) = 0 & \text{i.c.} \end{cases} \quad (\text{S1-13})$$

where  $c_{p_s}$  is the soil specific heat capacity ( $\text{J kg}^{-1} \text{K}^{-1}$ ),  $\rho_s$  is the soil density ( $\text{kg m}^{-3}$ ), and  $T_{s_{ref}}$  is the soil temperature (K) at the reference depth  $l_{s_{ref}}$  (m). The heat flow associated with fresh medium inflow  $Q_{in}$  was computed from the equation:

$$Q_i = \rho_w c_{p_w} q^{in}(T^{in} - T_p) \quad (\text{S1-14})$$

where  $T^{in}$  is the water inflow temperature (K). Finally, the rain heat flow  $Q_r$  was expressed as:

$$Q_r = \rho_w c_{p_w} v_r (T_a - T_p) S. \quad (\text{S1-15})$$

All the parameters values used in the energy balance are tabulated in the study of [1] and reported in table S1-1.

Table S1-1: Parameter values of the energy balance

| Water Parameters    |                                                  |                                                                            |
|---------------------|--------------------------------------------------|----------------------------------------------------------------------------|
| $\rho_w$            | water density                                    | 998 ( $\text{kg}\cdot\text{m}^{-3}$ )                                      |
| $c_{p_w}$           | water heat capacity                              | $4.18\cdot 10^3$ ( $\text{J}\cdot\text{kg}^{-1}\cdot\text{K}^{-1}$ )       |
| $L_w$               | water latent heat                                | $2.45\cdot 10^6$ ( $\text{J}\cdot\text{kg}^{-1}$ )                         |
| $\varepsilon_w$     | water emissivity                                 | 0.97 (-)                                                                   |
| $M_w$               | water molecular weight                           | 0.018 ( $\text{kg}\cdot\text{mol}^{-1}$ )                                  |
| Soil Parameters     |                                                  |                                                                            |
| $k_s$               | soil thermal conductivity                        | 1.7 ( $\text{W}\cdot\text{m}^{-1}\cdot\text{K}^{-1}$ )                     |
| $c_{p_s}$           | soil heat capacity                               | $1.25\cdot 10^3$ ( $\text{J}\cdot\text{kg}^{-1}\cdot\text{K}^{-1}$ )       |
| $\rho_s$            | soil density                                     | $1.9\cdot 10^3$ ( $\text{kg}\cdot\text{m}^{-3}$ )                          |
| $T_{s_{ref}}$       | soil temperature at $l_{s_{ref}} = 4.5\text{m}$  | 286.75 (K)                                                                 |
| Air Parameters      |                                                  |                                                                            |
| $\varepsilon_a$     | air emissivity                                   | 0.8 (-)                                                                    |
| $\nu_a$             | air kinematics viscosity                         | $1.5\cdot 10^{-5}$ ( $\text{m}\cdot\text{s}^{-1}$ )                        |
| $\lambda_a$         | air thermal conductivity                         | $2.6\cdot 10^{-2}$ ( $\text{W}\cdot\text{m}^{-1}\cdot\text{K}^{-1}$ )      |
| $\alpha_a$          | air thermal diffusivity                          | $2.2\cdot 10^{-5}$ ( $\text{m}\cdot\text{s}^{-1}$ )                        |
| $D_{w,a}$           | mass diffusion coefficient of water vapor in air | $2.4\cdot 10^{-5}$ ( $\text{m}\cdot\text{s}^{-2}$ )                        |
| Pond parameters     |                                                  |                                                                            |
| $V_0$               | initial pond volume                              | 30 ( $\text{m}^3$ )                                                        |
| $S$                 | pond surface                                     | 100 ( $\text{m}^2$ )                                                       |
| $L$                 | pond characteristic length                       | 10 (m)                                                                     |
| $\alpha$            | power law exponent                               | 0.29 (-)                                                                   |
| $z$                 | wind velocity height                             | 0.5 (m)                                                                    |
| $z_0$               | wind sensor height                               | 10 (m)                                                                     |
| $f_a$               | algal absorption fraction                        | 2.5 (%)                                                                    |
| Universal constants |                                                  |                                                                            |
| $\sigma_{SB}$       | Stephan-Boltzmann constant                       | $5.67\cdot 10^{-8}$ ( $\text{W}\cdot\text{m}^{-2}\cdot\text{K}^{-4}$ )     |
| $R$                 | ideal gas constant                               | 8.314 ( $\text{Pa}\cdot\text{m}^3\cdot\text{mol}^{-1}\cdot\text{K}^{-1}$ ) |

---

## S1.2 Determining the solar irradiance from cloudiness data

The solar irradiance  $H_s$  was calculated from cloudiness data  $CC$ , by using the Kasten and Czeplak correlation, recommended by [2] due to its high accuracy (the average error on solar irradiance estimates is generally within  $20 \text{ W m}^{-2}$ ):

$$H_s = \begin{cases} 0 & \text{if } \omega < -\omega_s \text{ or } \omega > \omega_s \\ \frac{H_c(4-3(CC/8)^{3.4})}{4} & \text{if } -\omega_s \leq \omega \leq \omega_s, \end{cases} \quad (\text{S1-16})$$

where  $CC$  is the cloudiness expressed in OKTAS (range  $0 \div 8$ ),  $H_c$  is the clear-sky total irradiance ( $\text{W m}^{-2}$ ),  $\omega$  is the hour angle which varies from  $-\pi$  to  $\pi$  over a day,  $-\omega_s$  and  $\omega_s$  are, respectively, the hour angle values at sunrise and sunset. The variable  $\omega_s$  is calculated from the following equation:

$$\cos \omega_s = -\tan \delta \tan \phi, \quad (\text{S1-17})$$

where  $\phi$  is the local latitude and  $\delta$  is the solar declination angle. The term  $\delta$  was evaluated as follows ([3]):

$$\delta = 23.45 \frac{\pi}{180} \sin \left( 2\pi \frac{284 + N}{365} \right), \quad (\text{S1-18})$$

where  $N$  is the Julian day of the year ( $N = 1$  for the first day of January). The clear-sky radiation  $H_c$  was given by ([3]):

$$H_c = H_{d,c} + H_{D,c} = (\tau_{d,c} + \tau_{D,c})H_0, \quad (\text{S1-19})$$

where  $\tau_{d,c} = H_{d,c}/H_0$  and  $\tau_{D,c} = H_{D,c}/H_0$ .  $H_{d,c}$  and  $H_{D,c}$  are, respectively, the diffuse and the direct components of the clear-sky total irradiance ( $\text{W m}^{-2}$ ). The variable  $H_0$ , defined as the amount of solar radiation reaching the external surface of the atmosphere, was given by ([3]):

$$H_0 = I_{sc} \left( 1 + 0.033 \cos \frac{360N}{365} \right) \cos \theta_z, \quad (\text{S1-20})$$

where  $I_{sc}$  is the solar constant ( $1367 \text{ W m}^{-2}$ ) and  $\theta_z$  is the zenith angle (the angle between the vertical axis and the sun direction), evaluated through the expression:

$$\cos \theta_z = \sin \phi \sin \delta + \cos \phi \cos \delta \cos \omega. \quad (\text{S1-21})$$

The variable  $\tau_{D,c}$  was obtained through the following expression ([2]):

$$\tau_{D,c} = \exp(-\gamma T_{LK} A), \quad (\text{S1-22})$$

where  $T_{LK}$  is an empirical coefficient (set to 2.74). The term  $\gamma$  was given by the equation:

$$\gamma = \frac{1}{9.4 + 0.9A} \quad (\text{S1-23})$$

---

and  $A$  is the pressure-corrected air-mass, obtained from the following correlation ([2]):

$$A = \frac{1}{\cos \theta_z + 0.50572 \left( 96.07995 - \theta_z \frac{180}{\pi} \right)^{-1.6364}}. \quad (\text{S1-24})$$

Finally, the variable  $\tau_{d,c}$  is determined through the Erbs correlation (recommended by [3]):

$$K_d = \begin{cases} 1.0 - 0.09k_T & \text{if } k_T \leq 0.22 \\ 0.9511 - 0.1604k_T + 4.388k_T^2 + \\ \quad -16.638k_T^3 + 12.336k_T^4 & \text{if } 0.22 < k_T \leq 0.8 \\ 0.16527 & \text{if } k_T > 0.8 \end{cases} \quad (\text{S1-25})$$

where  $K_d = \tau_{d,c}/(\tau_{d,c} + \tau_{D,c})$  and  $k_T = \tau_{d,c} + \tau_{D,c}$ .

## S2 Meteorological data

The weather data extracted from the European Centre for Medium-Range Weather Forecast (ECMWF) website were: the air temperature  $T_a$ , the sky cloudiness  $CC$ , the relative humidity  $RH$ , the wind velocity  $v_w$  and the rain volumetric flux  $v_r$  during the simulated cultivation period. Figures S2-1, S2-2 and S2-3 represent, respectively, the implemented meteorological data for the Winter, Spring and Summer case studies.

# Bibliography

- [1] Q. Béchet, A. Shilton, J. B. K. Park, R. J. Craggs, B. Guieysse, Universal temperature model for shallow algal ponds provides improved accuracy, *Environ. Sci. Technol.* 45 (2011) 3702–3709. doi:10.1021/es1040706.
- [2] T. R. Marthews, Y. Malhi, H. Iwata, Calculating downward longwave radiation under clear and cloudy conditions over a tropical lowland forest site: an evaluation of model schemes for hourly data, *Theor. Appl. Climatol.* 107(3-4) (2012) 461–477. doi:10.1007/s00704-011-0486-9.
- [3] J. A. Duffie, W. A. Beckman, *Solar Engineering of Thermal Processes*, Little, Brown & Co., Boston, 1958.

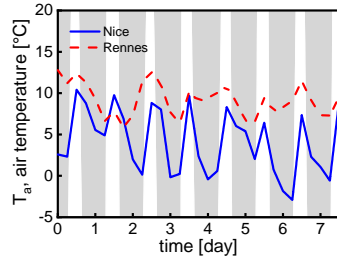(a) Winter: Air temperature  $T_a$ 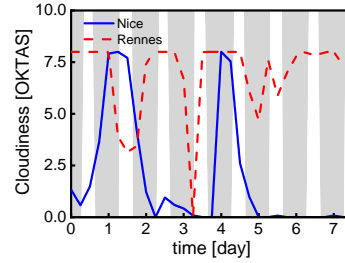

(b) Winter: Cloudiness

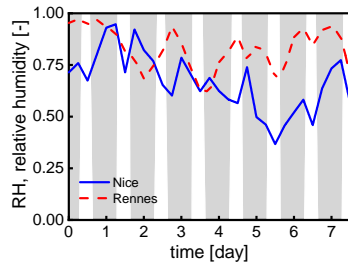(c) Winter: Relative humidity  $RH$ 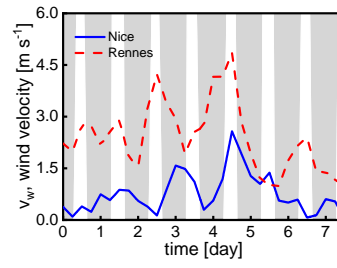

(d) Winter: Wind velocity

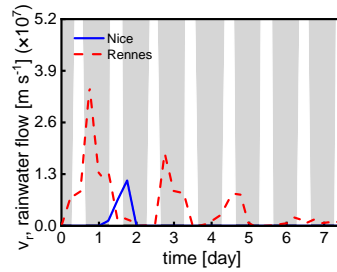

(e) Winter: Rain

Figure S2-1: Meteorological data: Winter case (Plain line: Nice; dashed line: Rennes. The background is colored in white at daytime and in grey at night-time.)



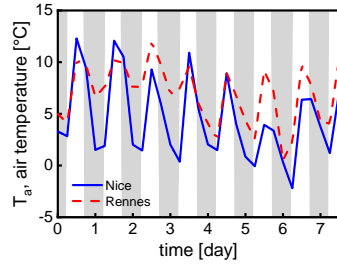(a) Spring: Air temperature  $T_a$ 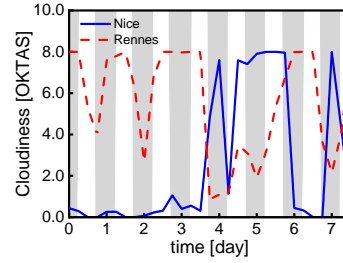

(b) Spring: Cloudiness

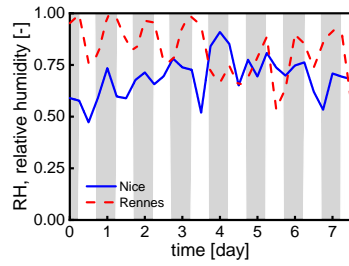(c) Spring: Relative humidity  $RH$ 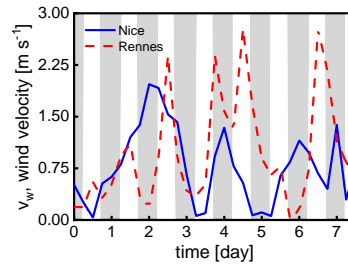

(d) Spring: Wind velocity

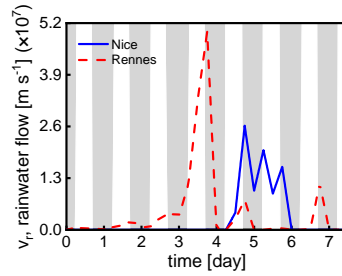

(e) Spring: Rain

Figure S2-2: Meteorological data: Spring case (Plain line: Nice; dashed line: Rennes. The background is colored in white at daytime and in grey at night-time.)

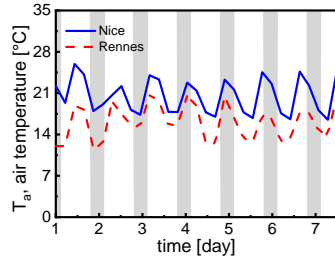(a) Summer: Air temperature  $T_a$ 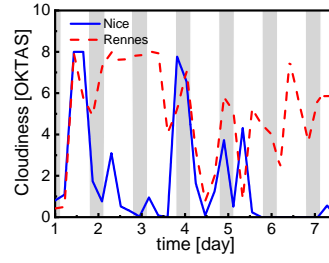

(b) Summer: Cloudiness

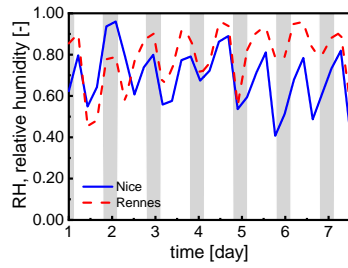(c) Summer: Relative humidity  $RH$ 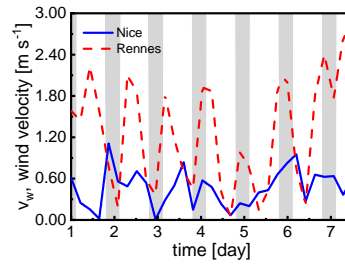

(d) Summer: Wind velocity

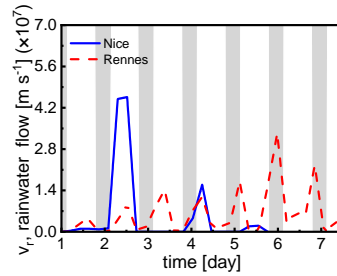

(e) Summer: Rain

Figure S2-3: Meteorological data: Summer case (Plain line: Nice; dashed line: Rennes. The background is colored in white at daytime and in grey at night-time.)
